# Supplementary material for: Pinus Susceptibility to Pitch Canker Triggers Specific Physiological Responses in Symptomatic Plants: An Integrated Approach
Source: PubMed Central journal article supplement (PMC6491765; doi:10.3389/fpls.2019.00509), 2019-04-24
Supplement: Image_1.pdf [file Image_1.pdf]

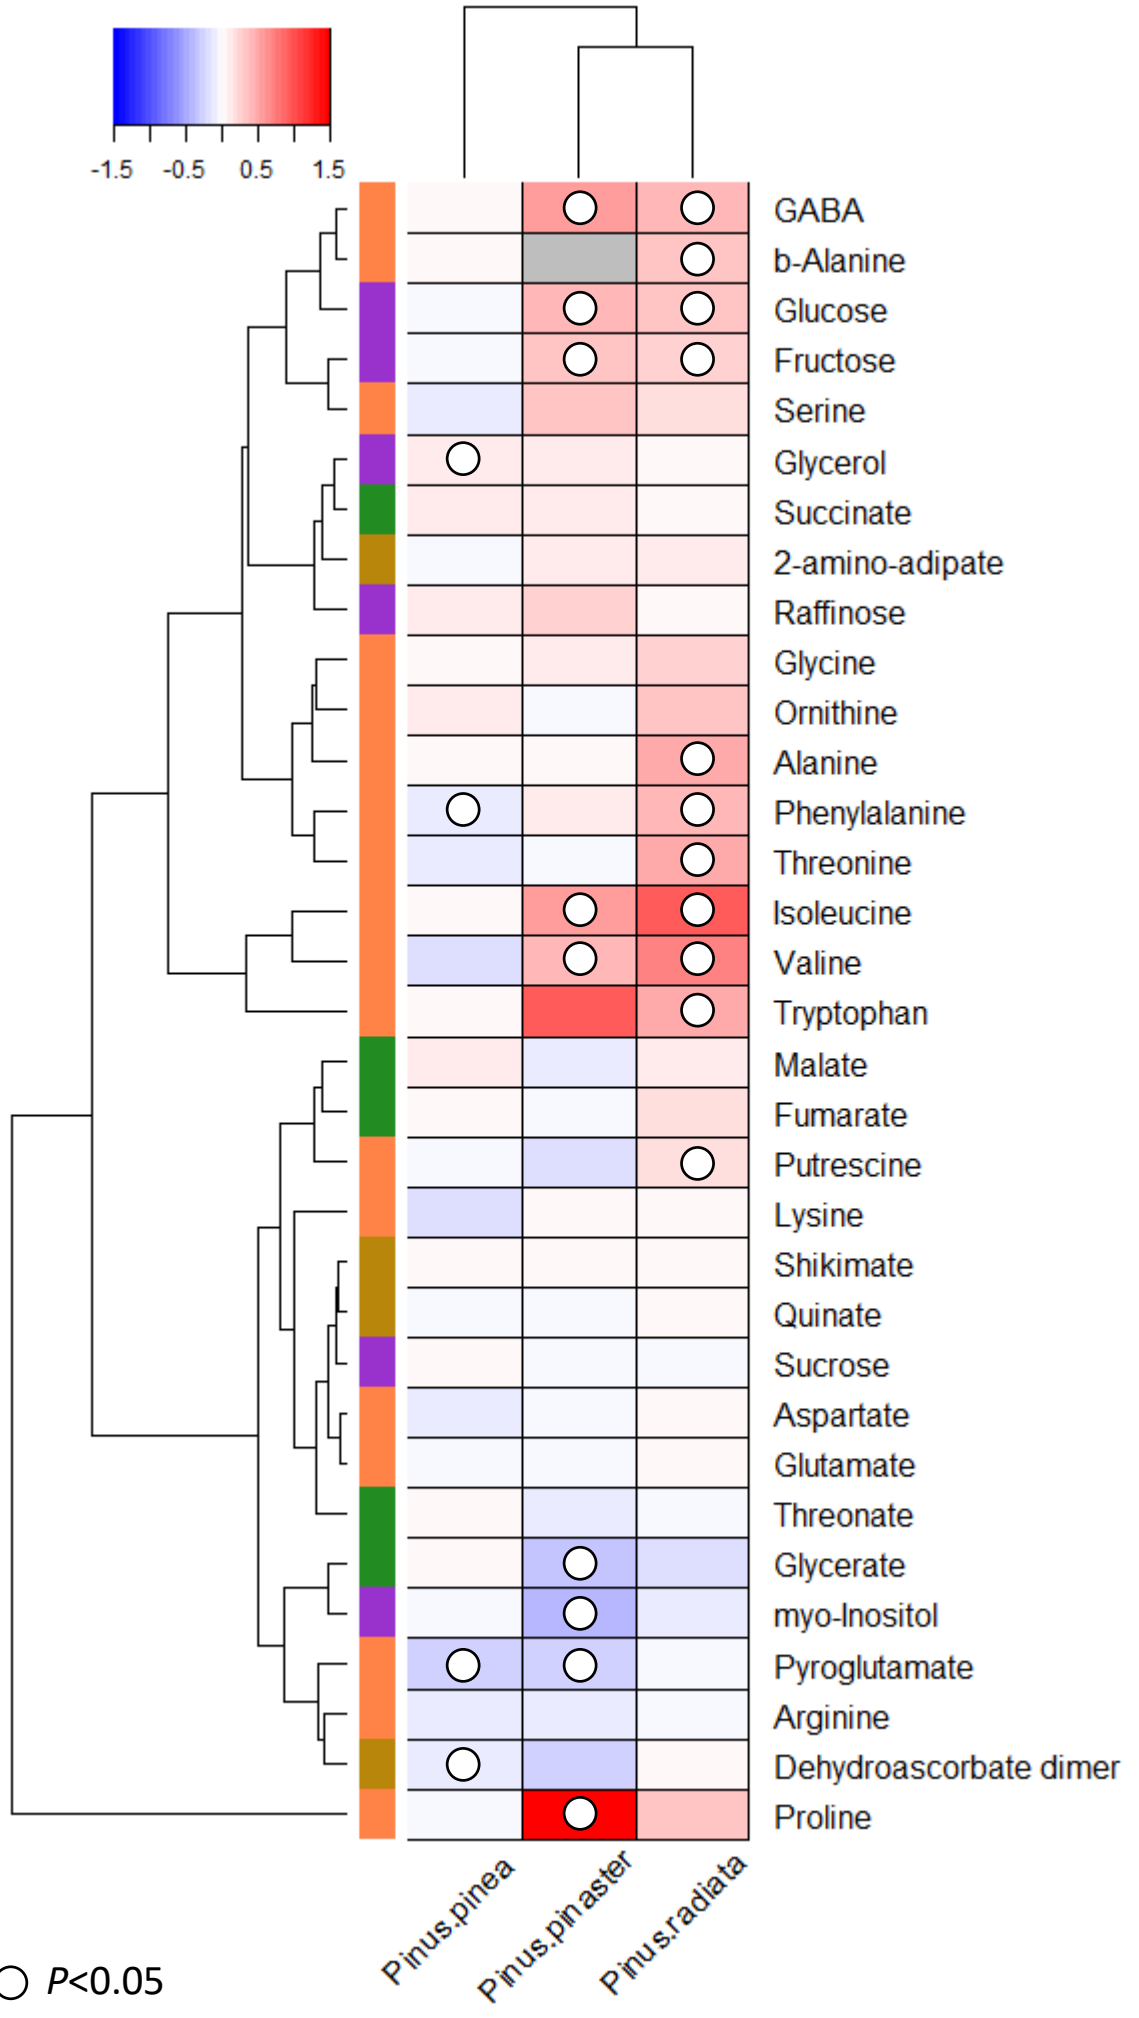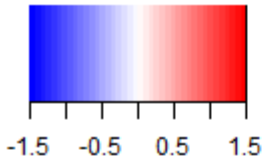

- AA
- AO
- SS
- O

○  $P < 0.05$

*Pinus.pinea*  
*Pinus.pin.aster*  
*Pinus.radiata*

**Figure S1** | Heatmap of primary metabolite changes occurring in *Pinus* inoculated with *F. circinatum* with respect to their non-inoculated controls when 50% of the inoculated plants of each species expressed disease symptoms. Relative values are normalized to the internal standard (ribitol) and dry weight (DW) of the samples. Values are presented as means  $\pm$  SE of six independent measurements. Significant changes using Student's *t* test are indicated as  $\circ P < 0.05$ , with respect to controls. False-colour imaging was performed on  $\log_{10}$ -transformed GC-TOF-MS data. Metabolites are grouped in sugars & sugar alcohols (SS), amino acids & derivatives (AA), organic acids (OA) and others (O).
